# Supplementary material for: Emergence of brain-like mirror-symmetric viewpoint tuning in convolutional neural networks
Source: eLife journal article supplement (doi:10.7554/elife.90256), 2024-04-25

**A**

Untrained AlexNet

Mirror-symmetric viewpoint tuning

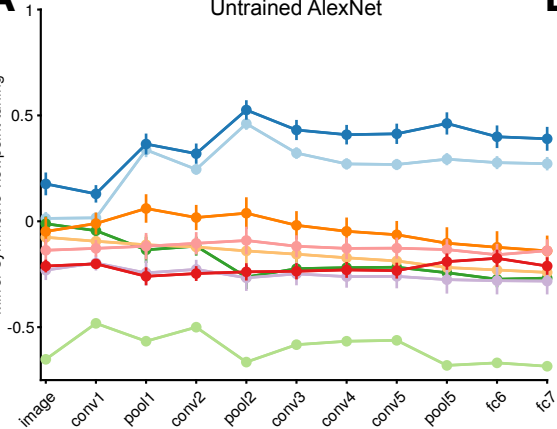**B**Difference between  
Trained and Untrained AlexNet

Mirror-symmetric viewpoint tuning

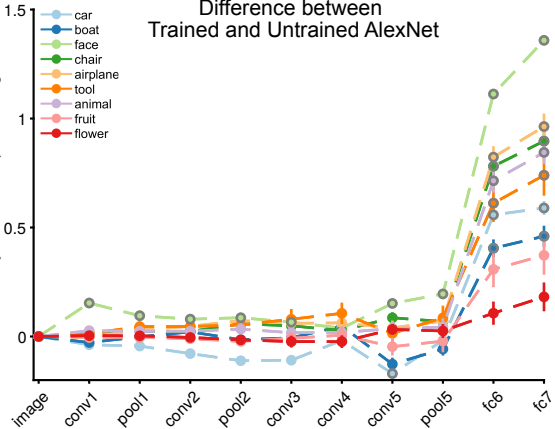

Supplement: supp [file elife-90256-supp-v1.zip]
