# Supplementary figures and images for: Emergence of brain-like mirror-symmetric viewpoint tuning in convolutional neural networks
Source: eLife journal article supplement (doi:10.7554/elife.90256), 2024-04-25

**A**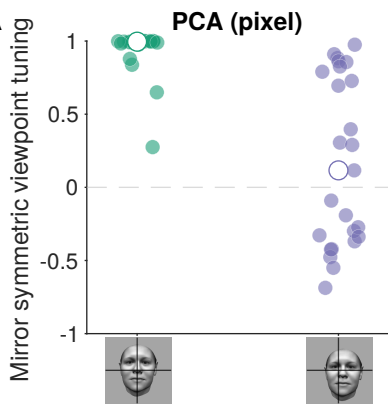**B**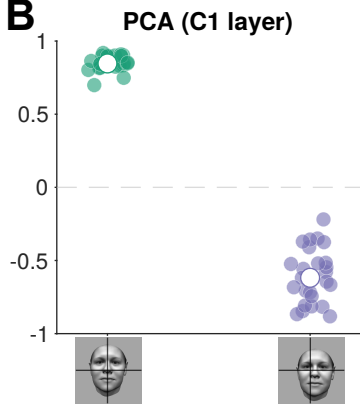**C**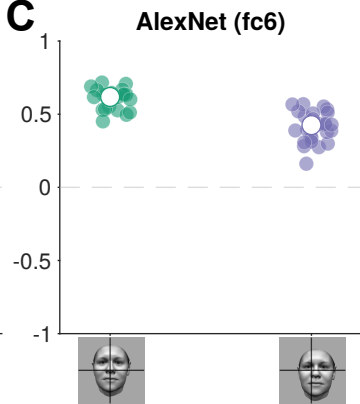

Supplement: supp [file elife-90256-supp-v1.zip]

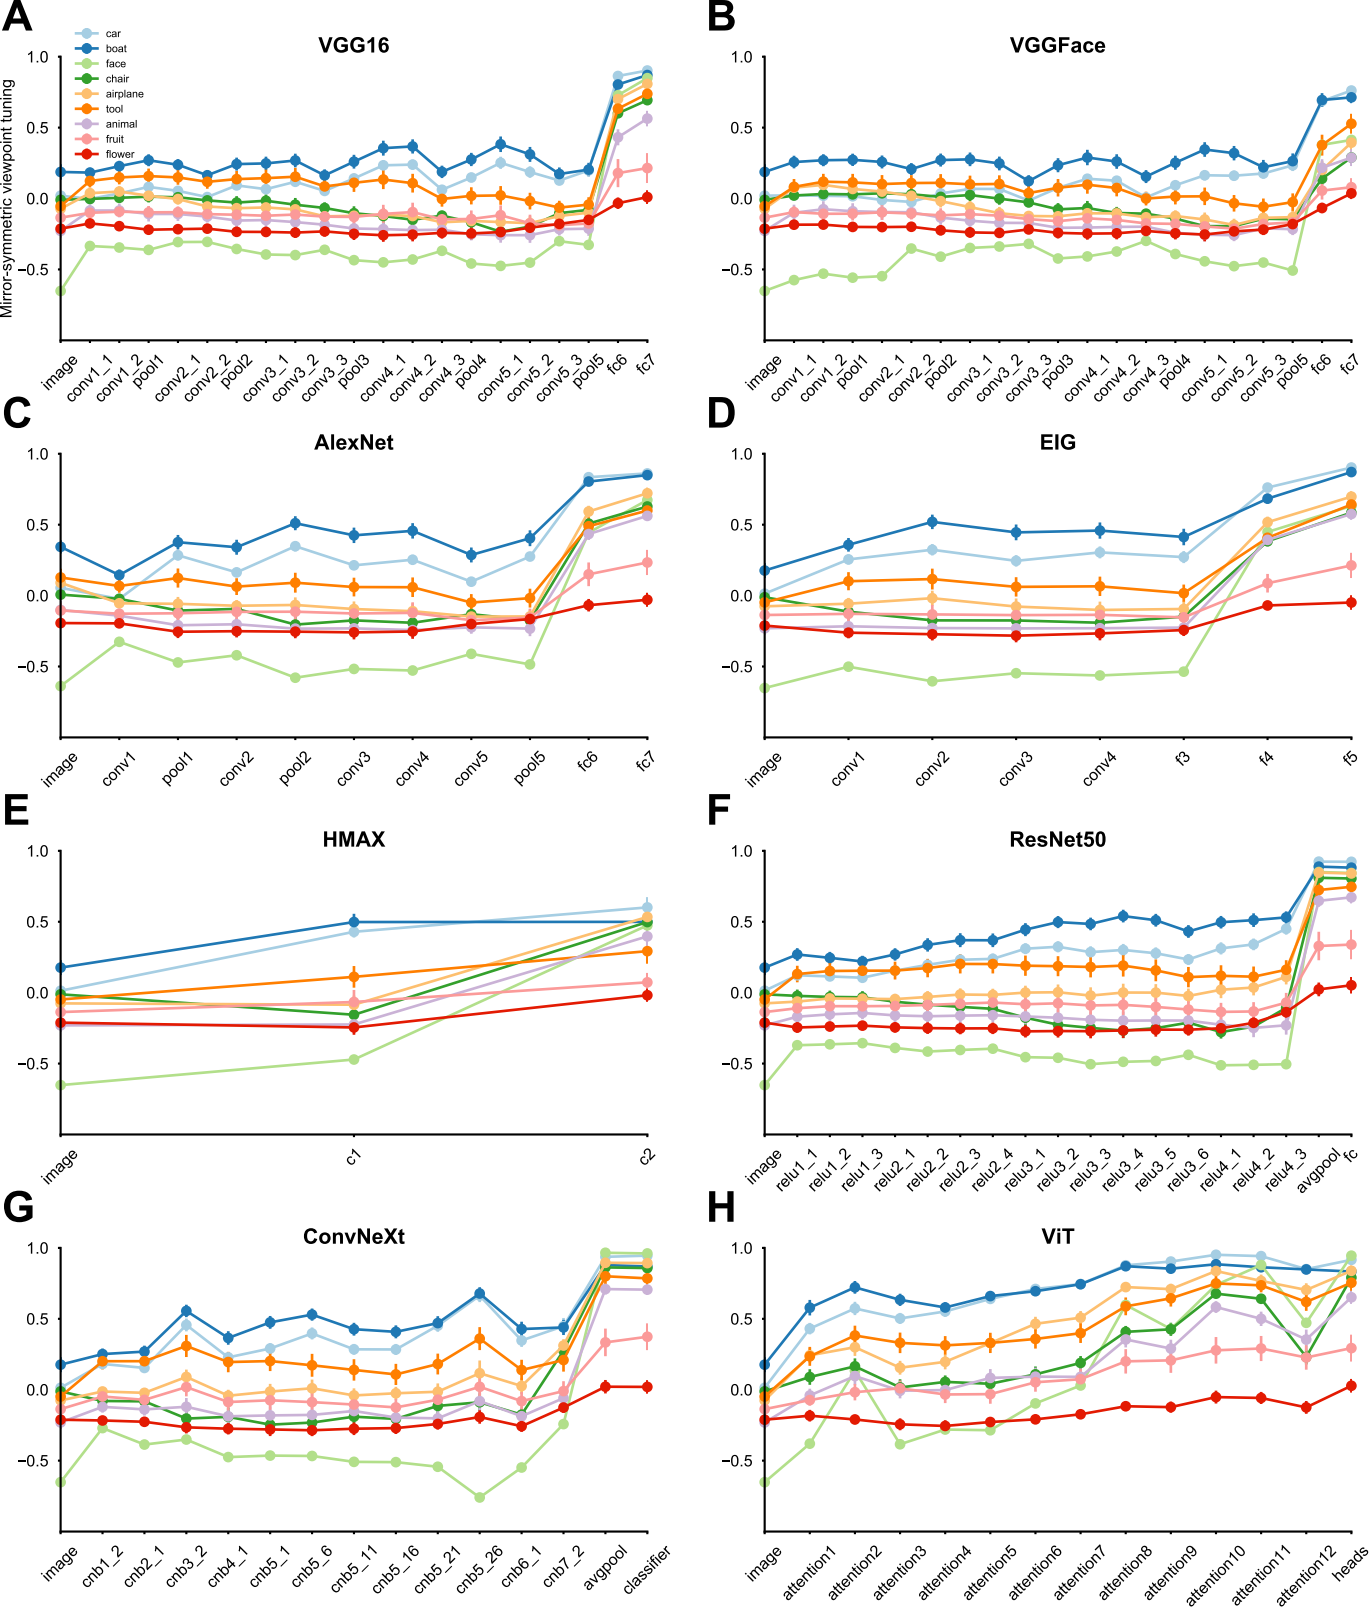

Supplement: supp [file elife-90256-supp-v1.zip]

# AlexNet (without Z-score normalization)

Mirror-symmetric viewpoint tuning

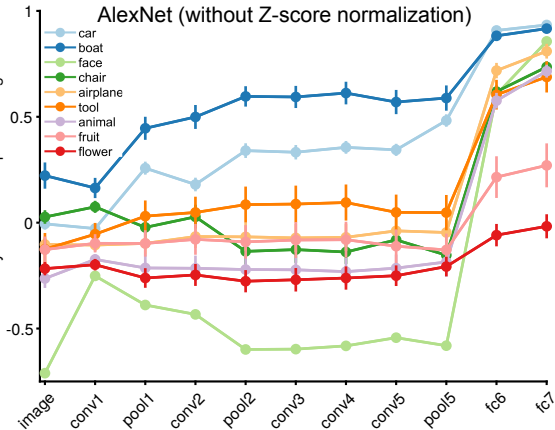

Supplement: supp [file elife-90256-supp-v1.zip]

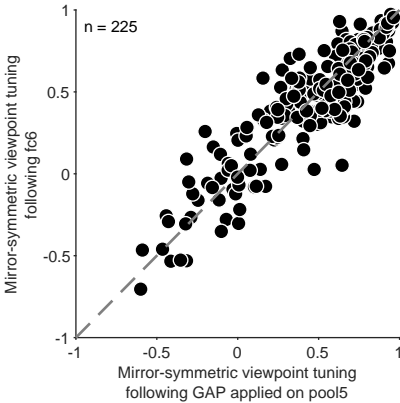

Supplement: supp [file elife-90256-supp-v1.zip]

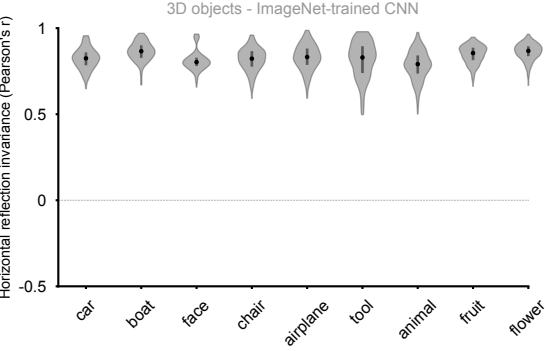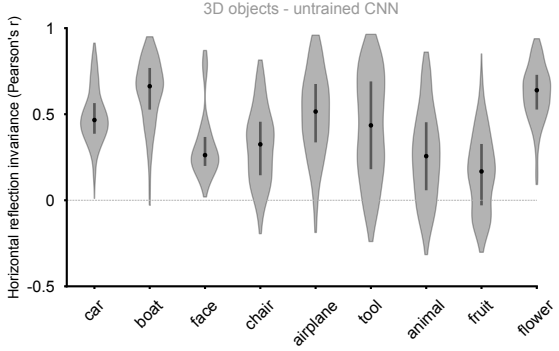

Supplement: supp [file elife-90256-supp-v1.zip]

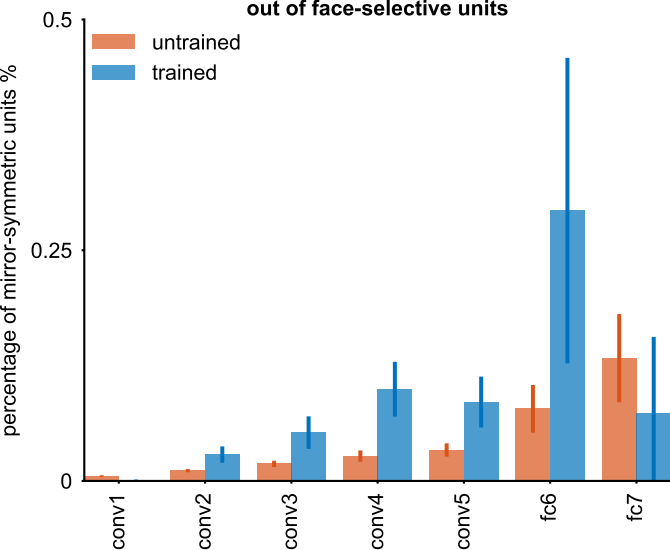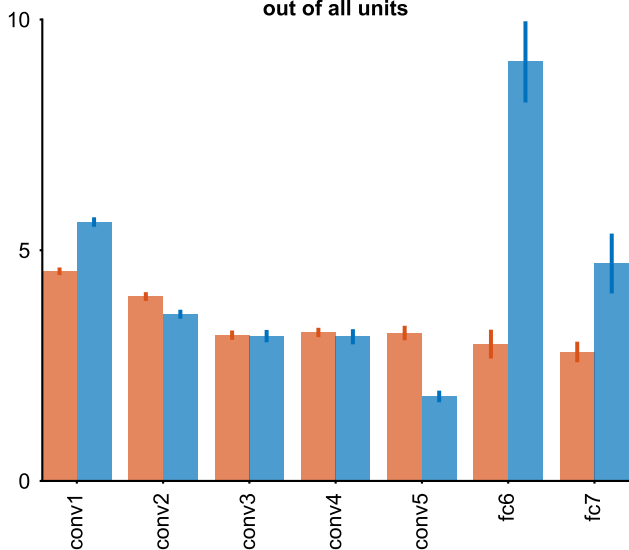

Supplement: supp [file elife-90256-supp-v1.zip]

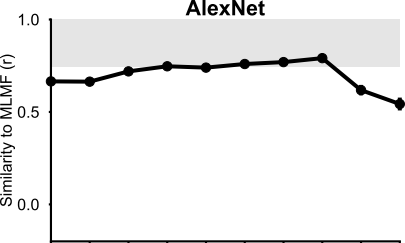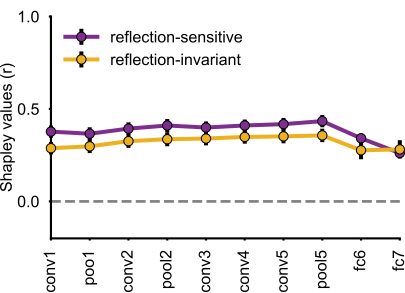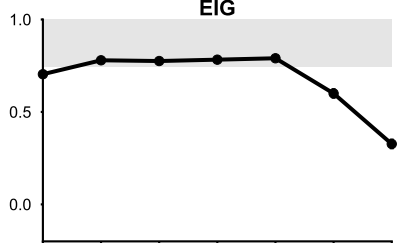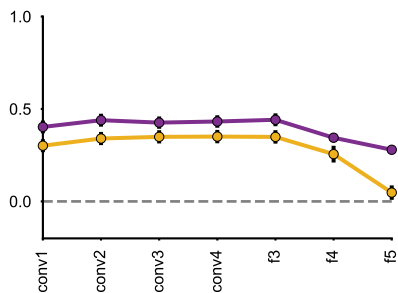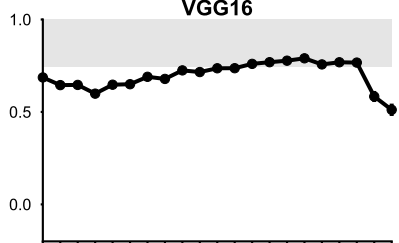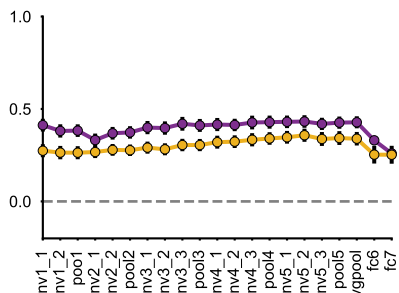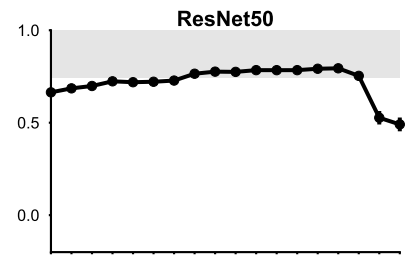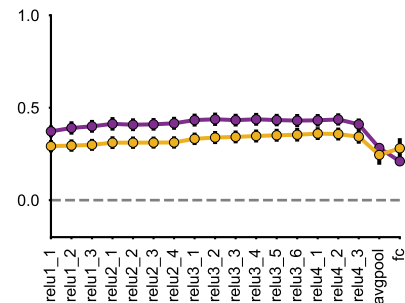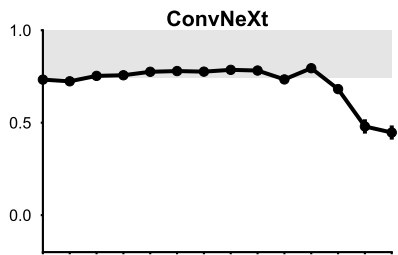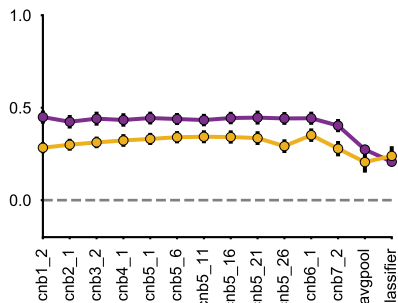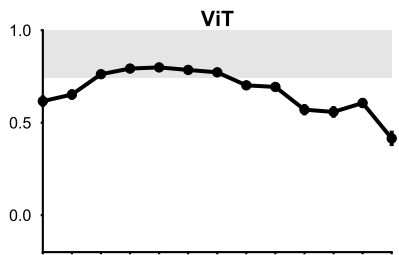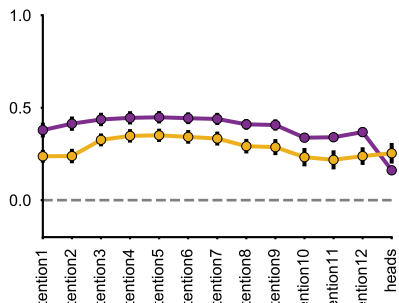

Supplement: supp [file elife-90256-supp-v1.zip]

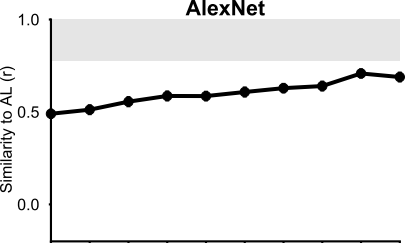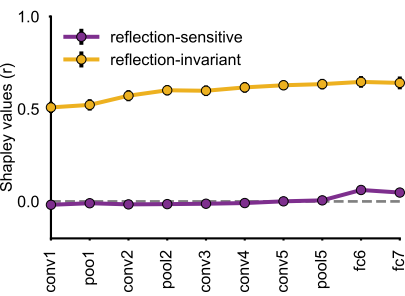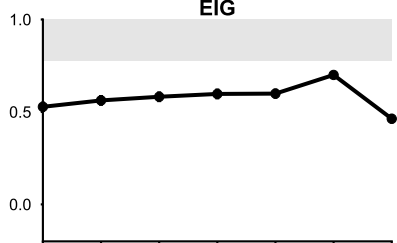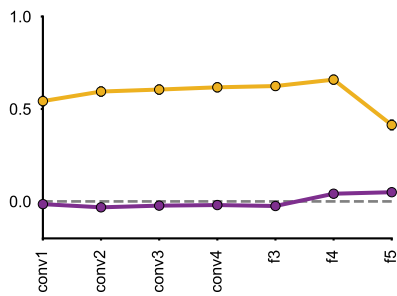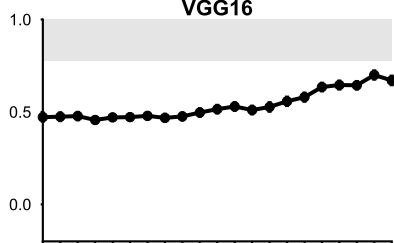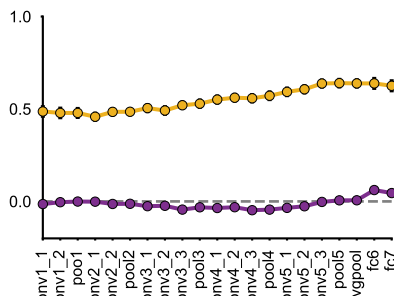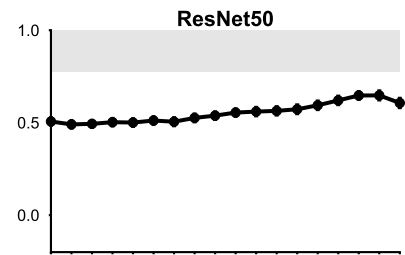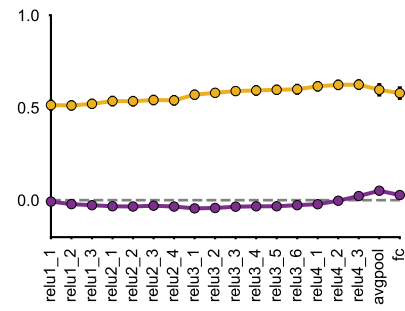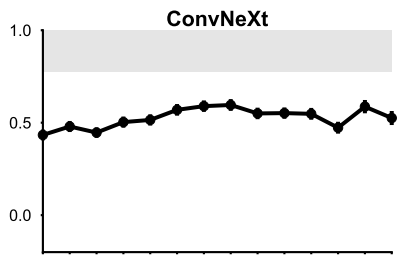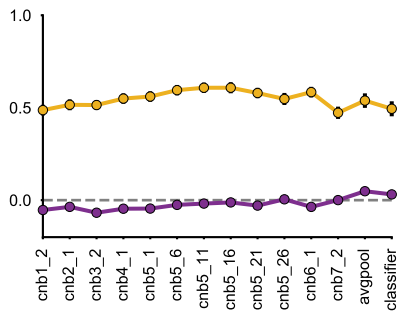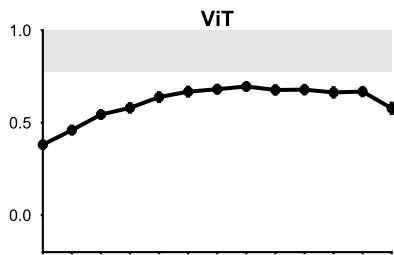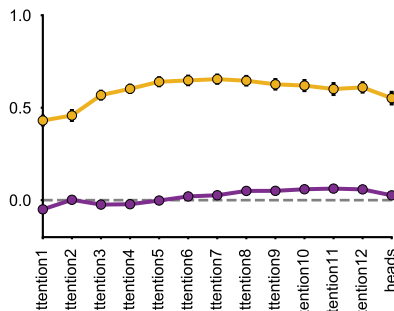

Supplement: supp [file elife-90256-supp-v1.zip]

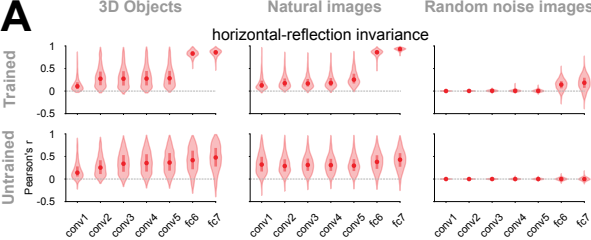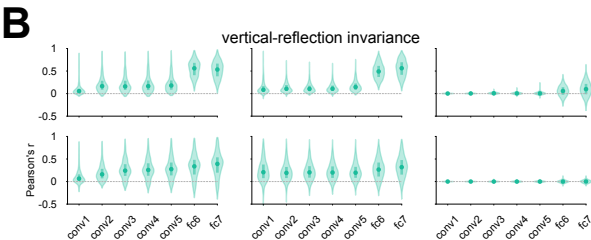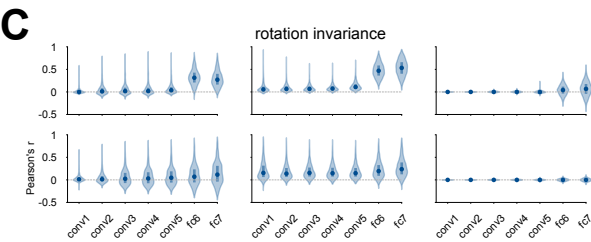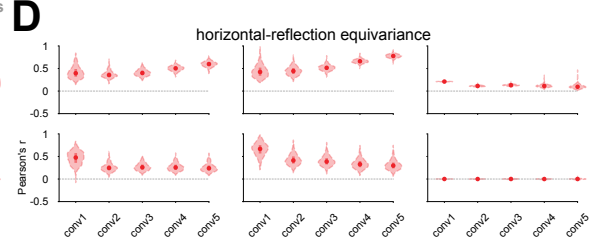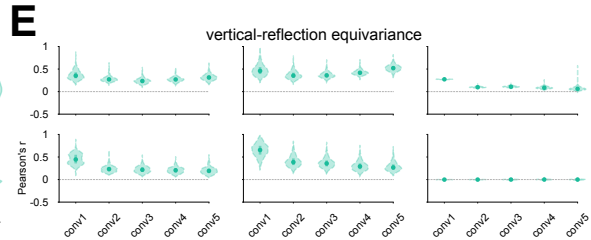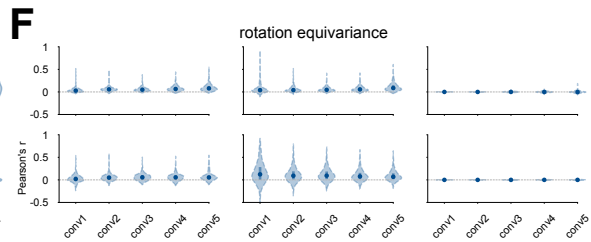

Supplement: supp [file elife-90256-supp-v1.zip]

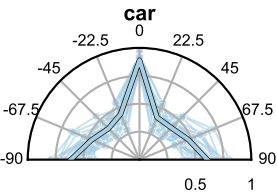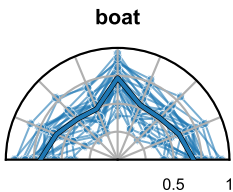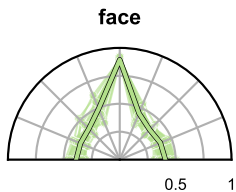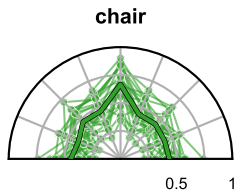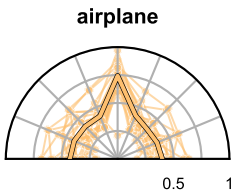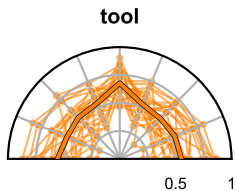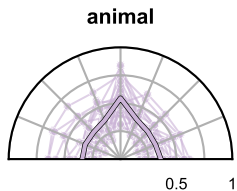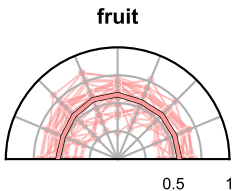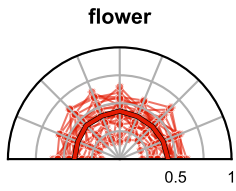

Supplement: supp [file elife-90256-supp-v1.zip]

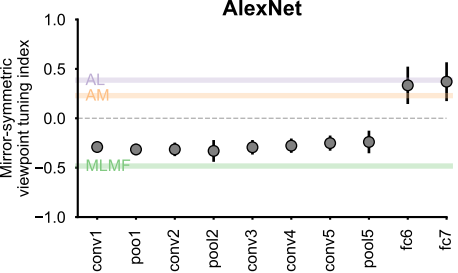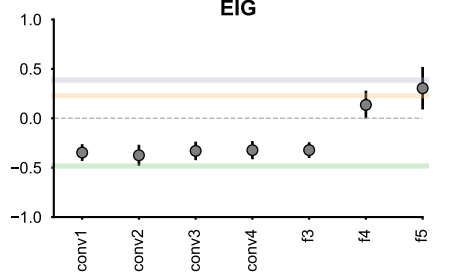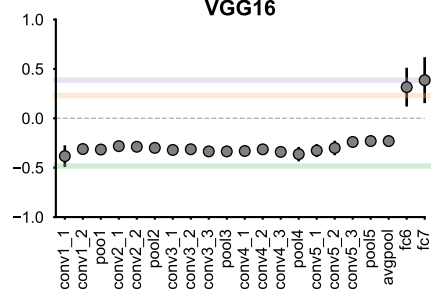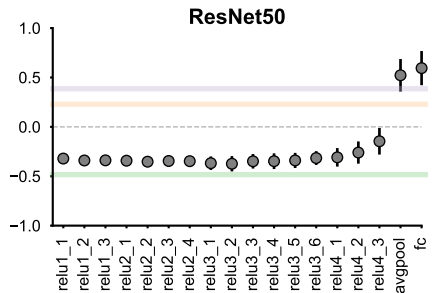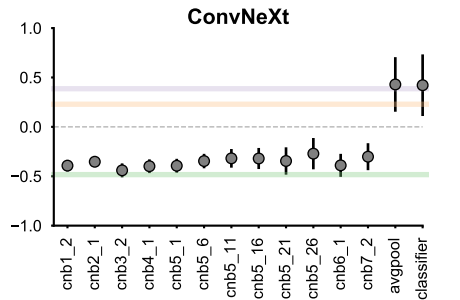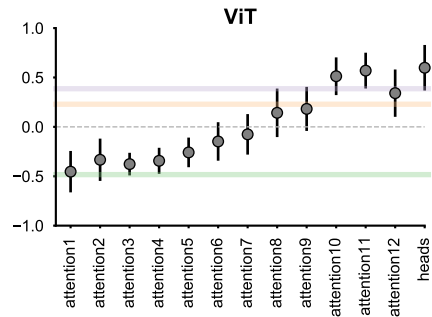

Supplement: supp [file elife-90256-supp-v1.zip]

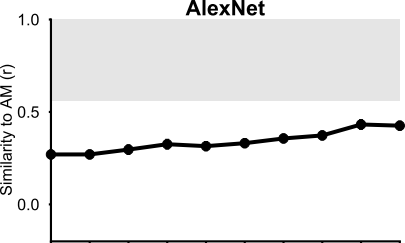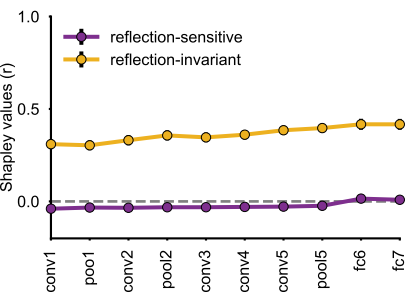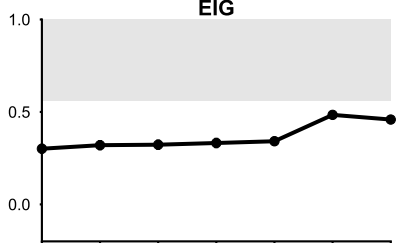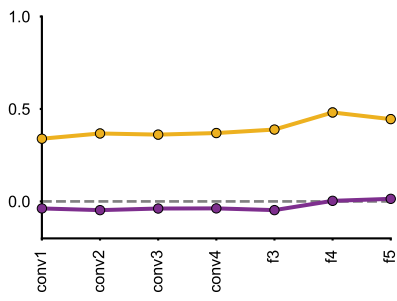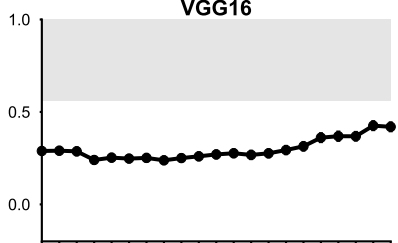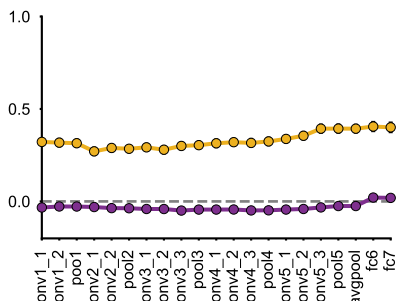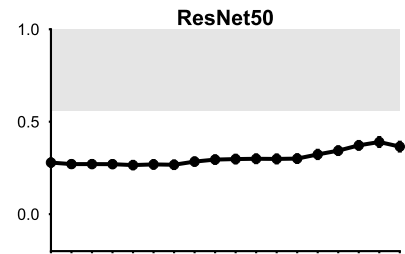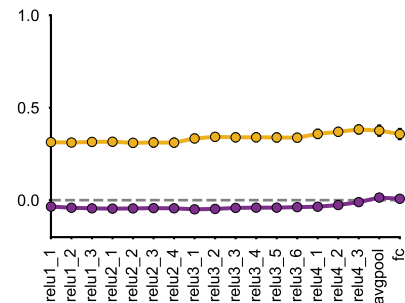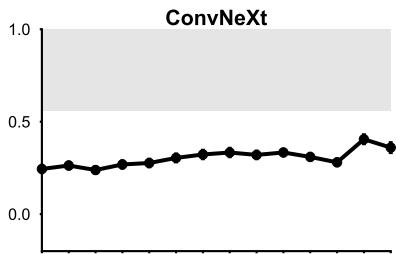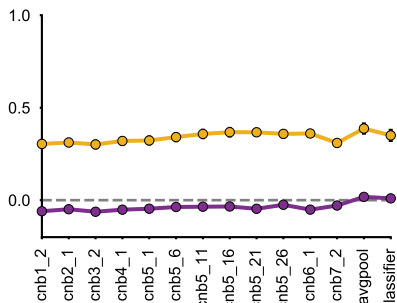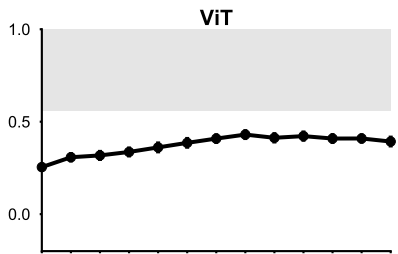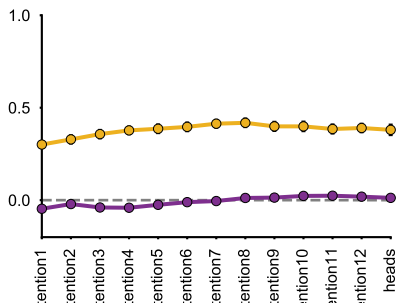

Supplement: supp [file elife-90256-supp-v1.zip]

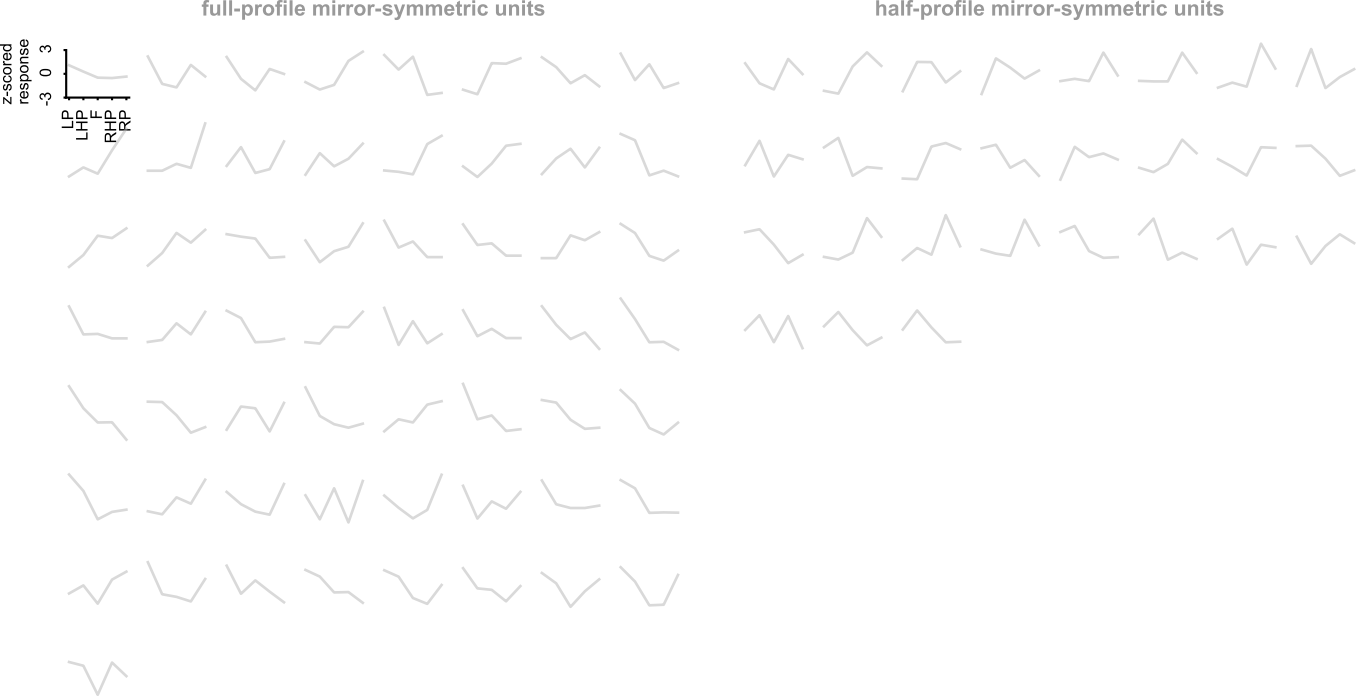

Supplement: supp [file elife-90256-supp-v1.zip]

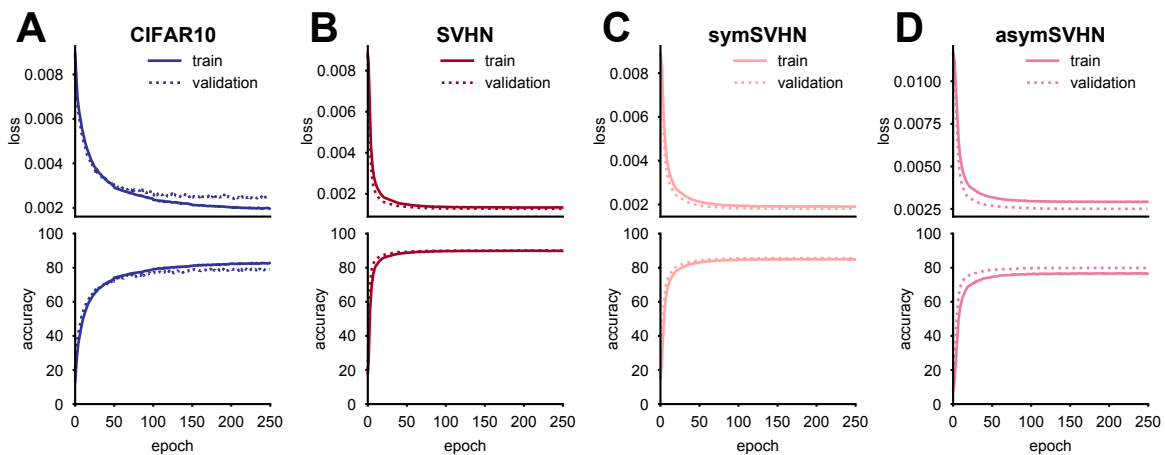

Supplement: supp [file elife-90256-supp-v1.zip]

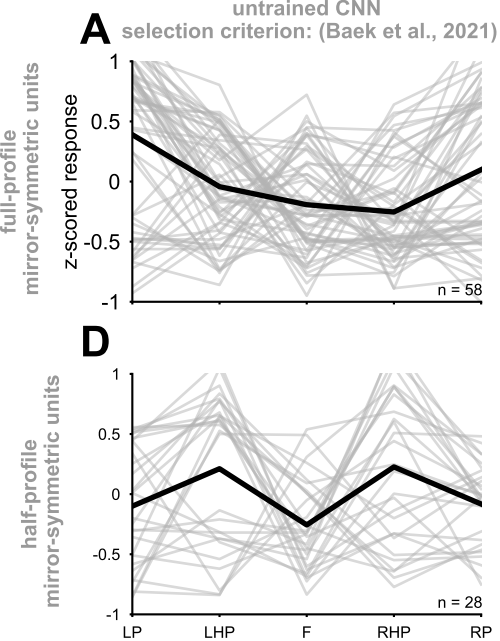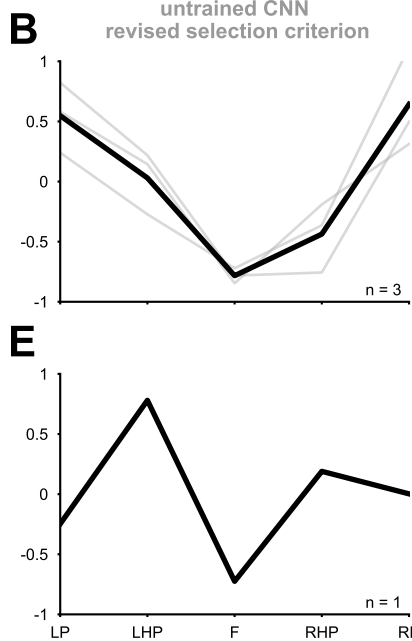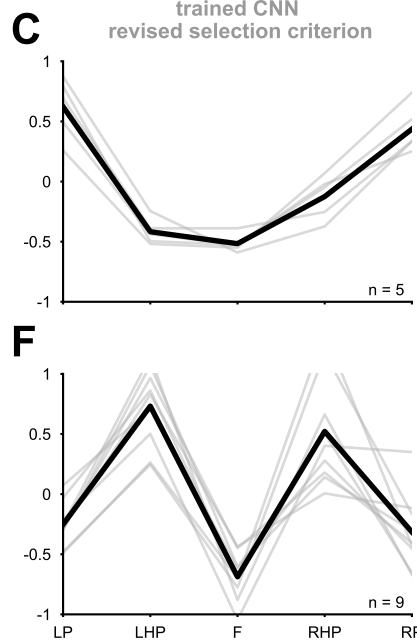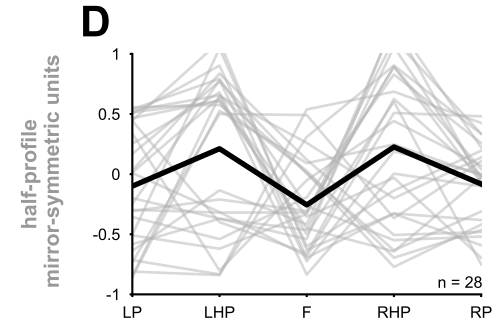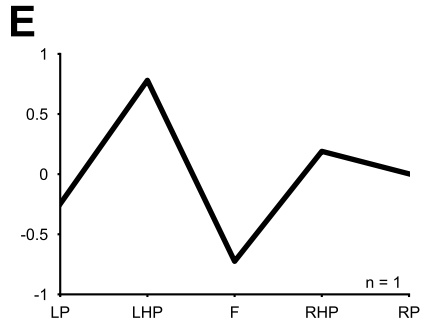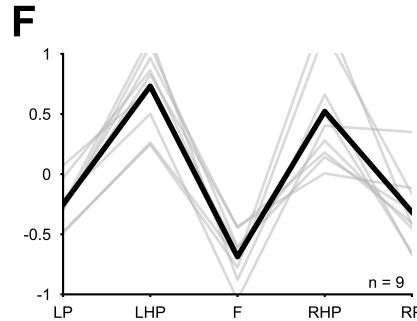

Supplement: supp [file elife-90256-supp-v1.zip]
